# Supplementary material
Source: PubMed Central journal article supplement (PMC5913598)

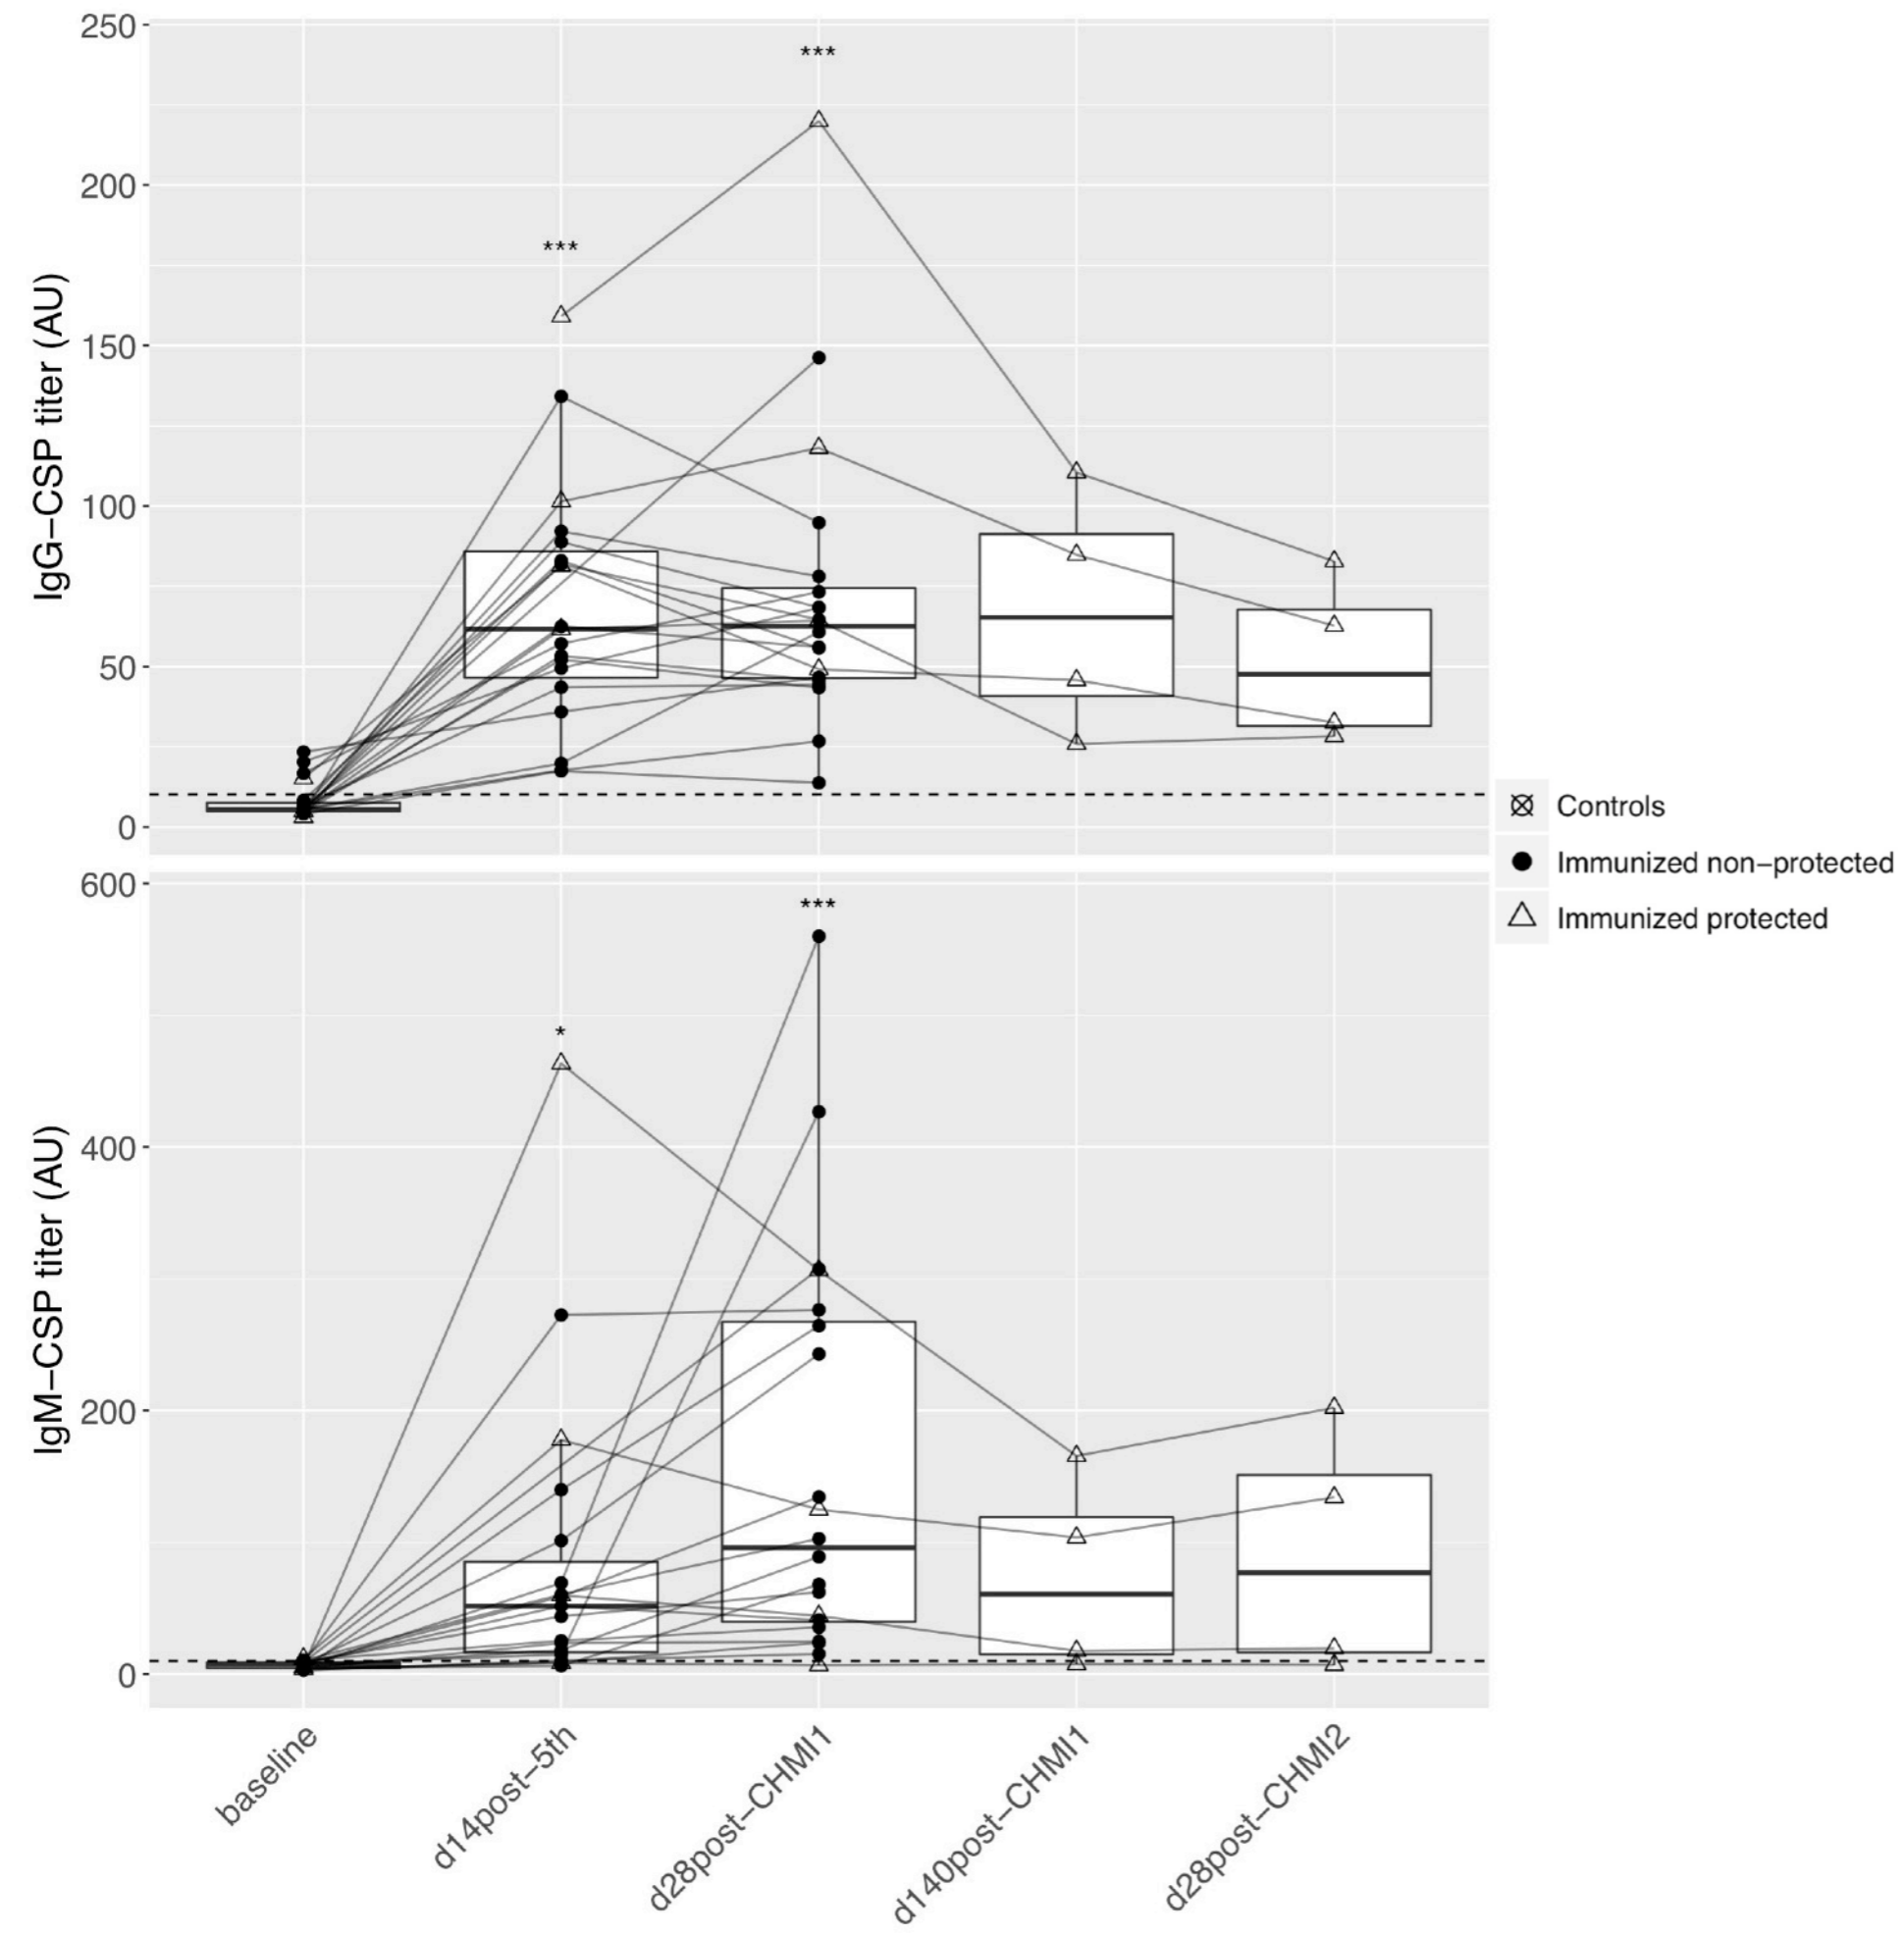

Supplement: jiy080_suppl_supplementary_figure_3.pdf [file jiy080_suppl_supplementary_figure_3.pdf]
